# Supplementary material for: The effect of heterocyclic π bridges on second order nonlinear optical properties of compounds formed between ferrocenyl and corannulenyl
Source: Royal Society of Chemistry journal article supplement (doi:10.1039/c6ra22020g), 2016-01-01
Supplement: c6ra22020g1.pdf [file c6ra22020g1.pdf]

**The effect of heterocyclic  $\pi$  bridges on second order nonlinear optical  
properties of compounds formed between ferrocenyl and  
corannuleny**

He Chen<sup>a</sup>, Li Wang<sup>a</sup>, Wen-Yong Wang<sup>a</sup>, Yong-Qing Qiu<sup>\*ab</sup>, Hai-Ming Xie<sup>\*ab</sup>

<sup>a</sup>Institute of Functional Material Chemistry, Faculty of Chemistry, Northeast Normal University, Changchun, Jilin 130024, China.

<sup>b</sup>National & Local United Engineering Laboratory for Power Battery, Faculty of Chemistry, Northeast Normal University, Changchun, Jilin 130024, China.

---

\* Corresponding Author. Fax: +86 431 85098768.

E-mail addresses: [qiuyq466@nenu.edu.cn](mailto:qiuyq466@nenu.edu.cn) (Y. Q. Qiu), [xiehm136@nenu.edu.cn](mailto:xiehm136@nenu.edu.cn) (H. M. Xie).

**Table S1** The energies ( $E$ , a.u.) of the endo- $n$  and exo- $n$  ( $n = 1-5$ ) compounds obtained by the B2PLYP functional.

| Compound | endo-1       | endo-2       | endo-3       | endo-4       | endo-5       |
|----------|--------------|--------------|--------------|--------------|--------------|
| $E$      | -2415.017401 | -2645.612370 | -2639.645234 | -2659.501495 | -2982.396382 |

  

| Compound | exo-1        | exo-2        | exo-3        | exo-4        | exo-5        |
|----------|--------------|--------------|--------------|--------------|--------------|
| $E$      | -2415.017109 | -2645.612471 | -2639.646737 | -2659.501079 | -2982.394052 |

**Table S2** The relative energies ( $E_{\text{rel}}$ , kcal/mol) between endo and exo conformers obtained by the MP2 functional.

| Compound      | $E_{\text{rel}}$ | Compound     | $E_{\text{rel}}$ |
|---------------|------------------|--------------|------------------|
| <b>endo-1</b> | 0                | <b>exo-1</b> | -0.05            |
| <b>endo-2</b> | 0                | <b>exo-2</b> | -0.15            |
| <b>endo-3</b> | 0                | <b>exo-3</b> | -1.02            |
| <b>endo-4</b> | 0                | <b>exo-4</b> | 0.11             |
| <b>endo-5</b> | 0                | <b>exo-5</b> | 4.69             |

**Table S3** The bowl depth (Å) for endo-n and exo-n (n = 3-5) compounds.

| Compound | <b>endo-3</b> | <b>exo-3</b> | <b>endo-4</b> | <b>exo-4</b> | <b>endo-5</b> | <b>exo-5</b> |
|----------|---------------|--------------|---------------|--------------|---------------|--------------|
| Depth    | 0.881         | 0.866        | 0.866         | 0.860        | 0.871         | 0.870        |

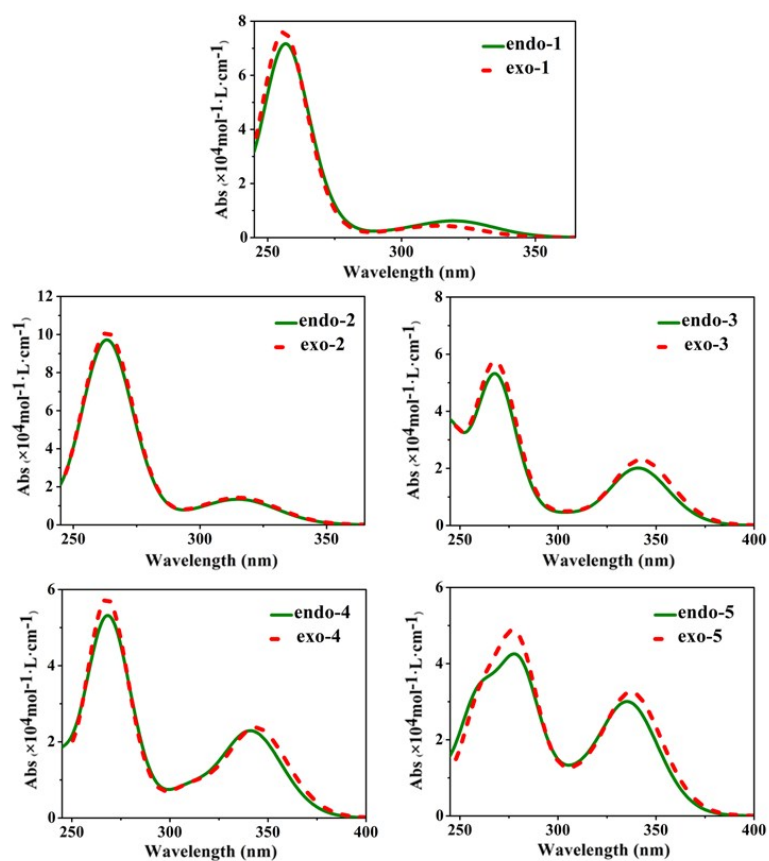

**Fig. S1** UV-vis spectra of endo-n and exo-n (n = 1-5) compounds.

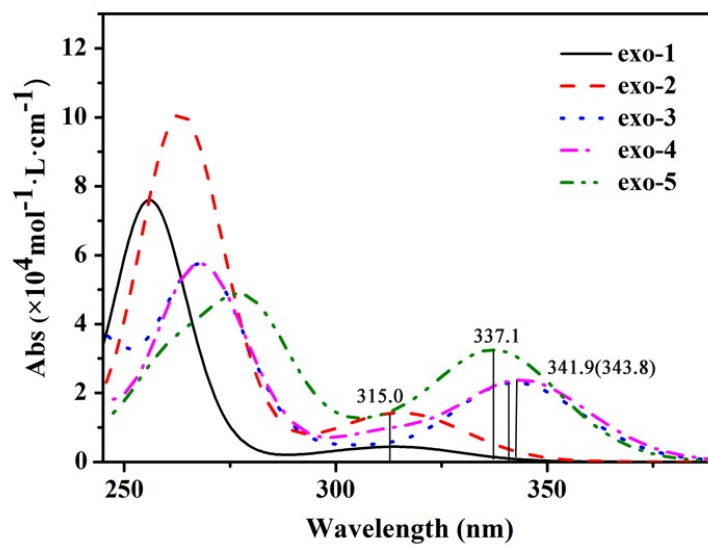

**Fig. S2** UV-vis spectra of exo-n (n = 1-5) compounds.

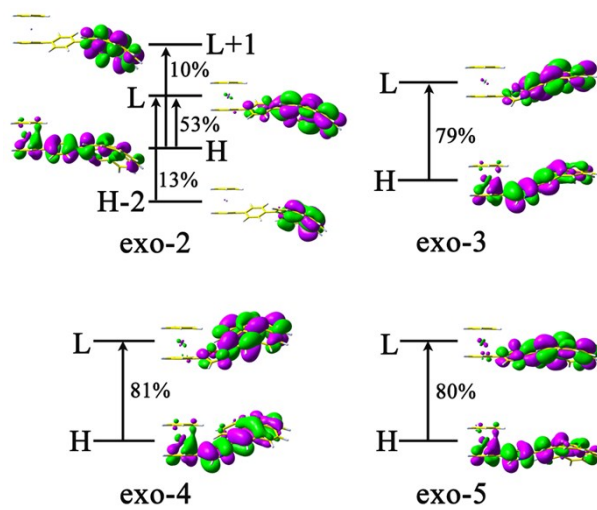

**Fig. S3** Molecular orbitals corresponding to the dominant electron transitions of exo-n (n = 2-5) compounds (H = HOMO, L = LUMO, H-2 = HOMO-2, L+1 = LUMO+1, etc.).
